# Supplementary material for: DTFLOW: Inference and Visualization of Single-cell Pseudotime Trajectory Using Diffusion Propagation
Source: PubMed Central journal article supplement (PMC8602766; doi:10.1016/j.gpb.2020.08.003), 2021-03-02

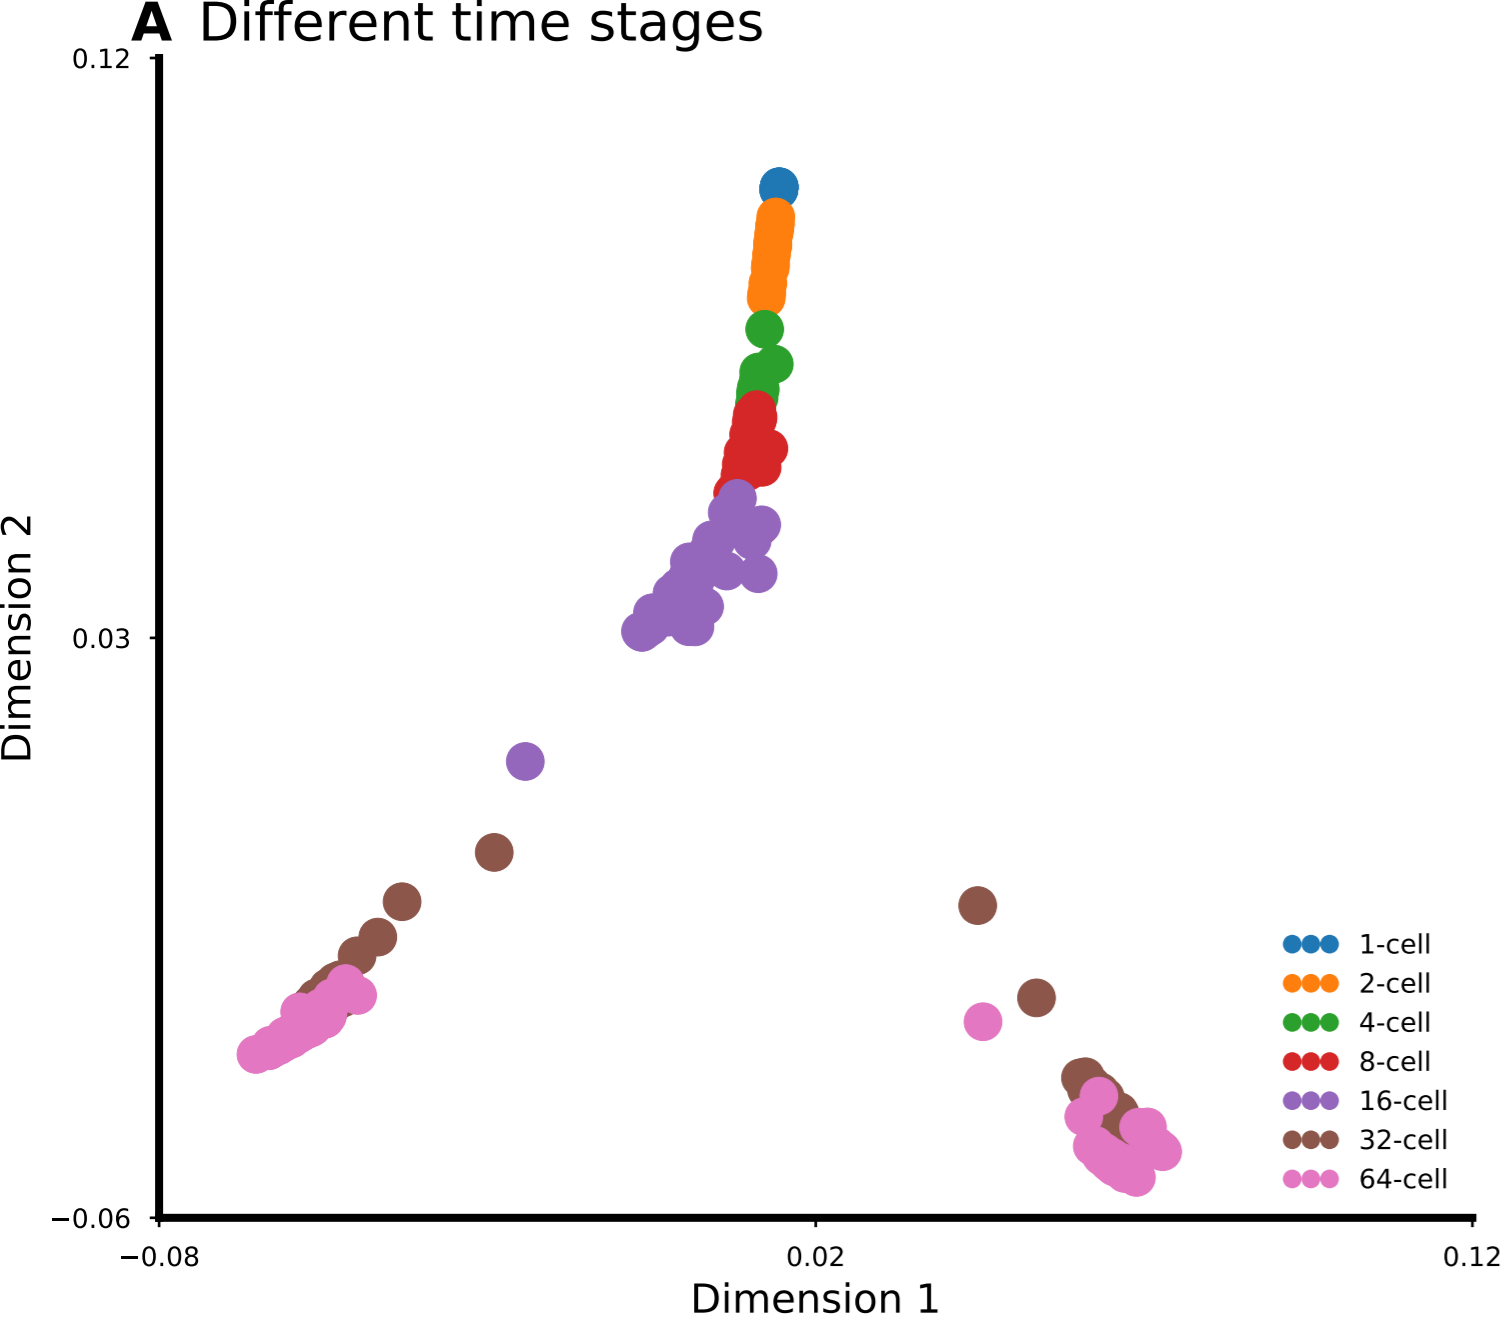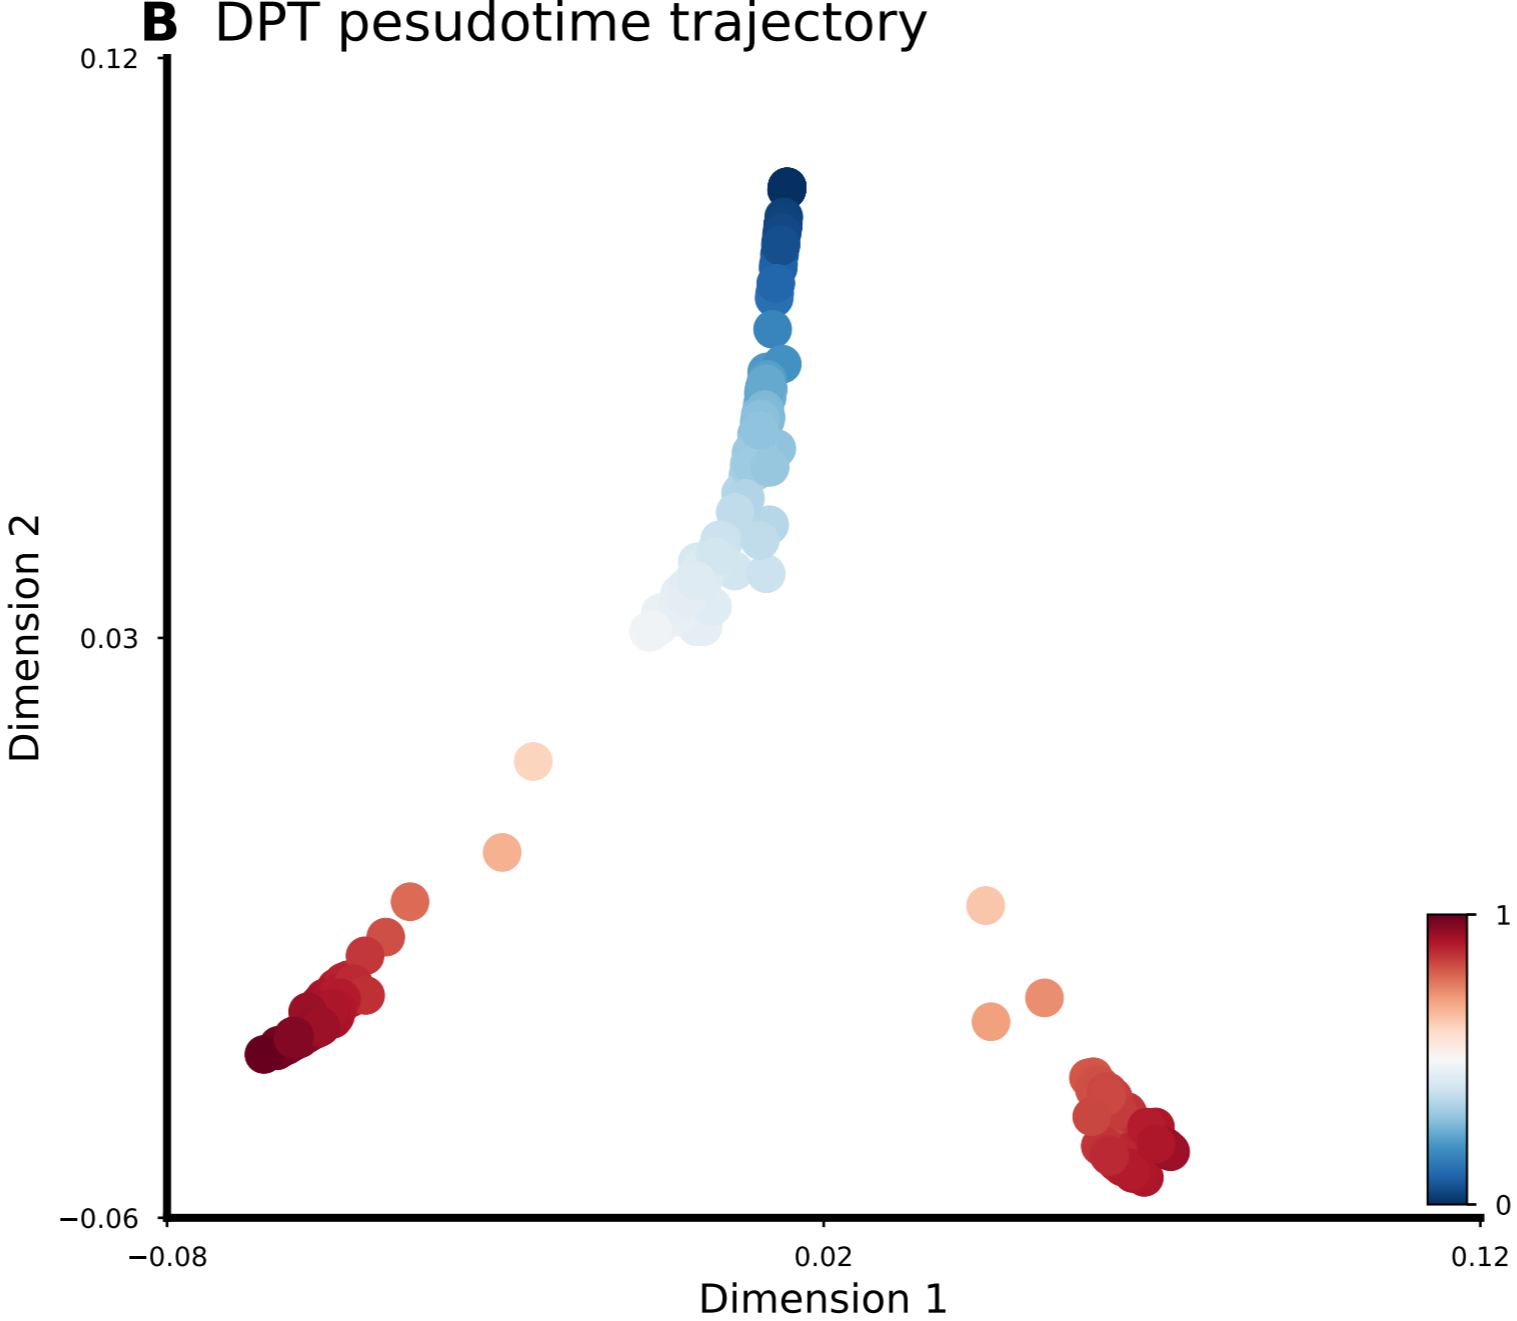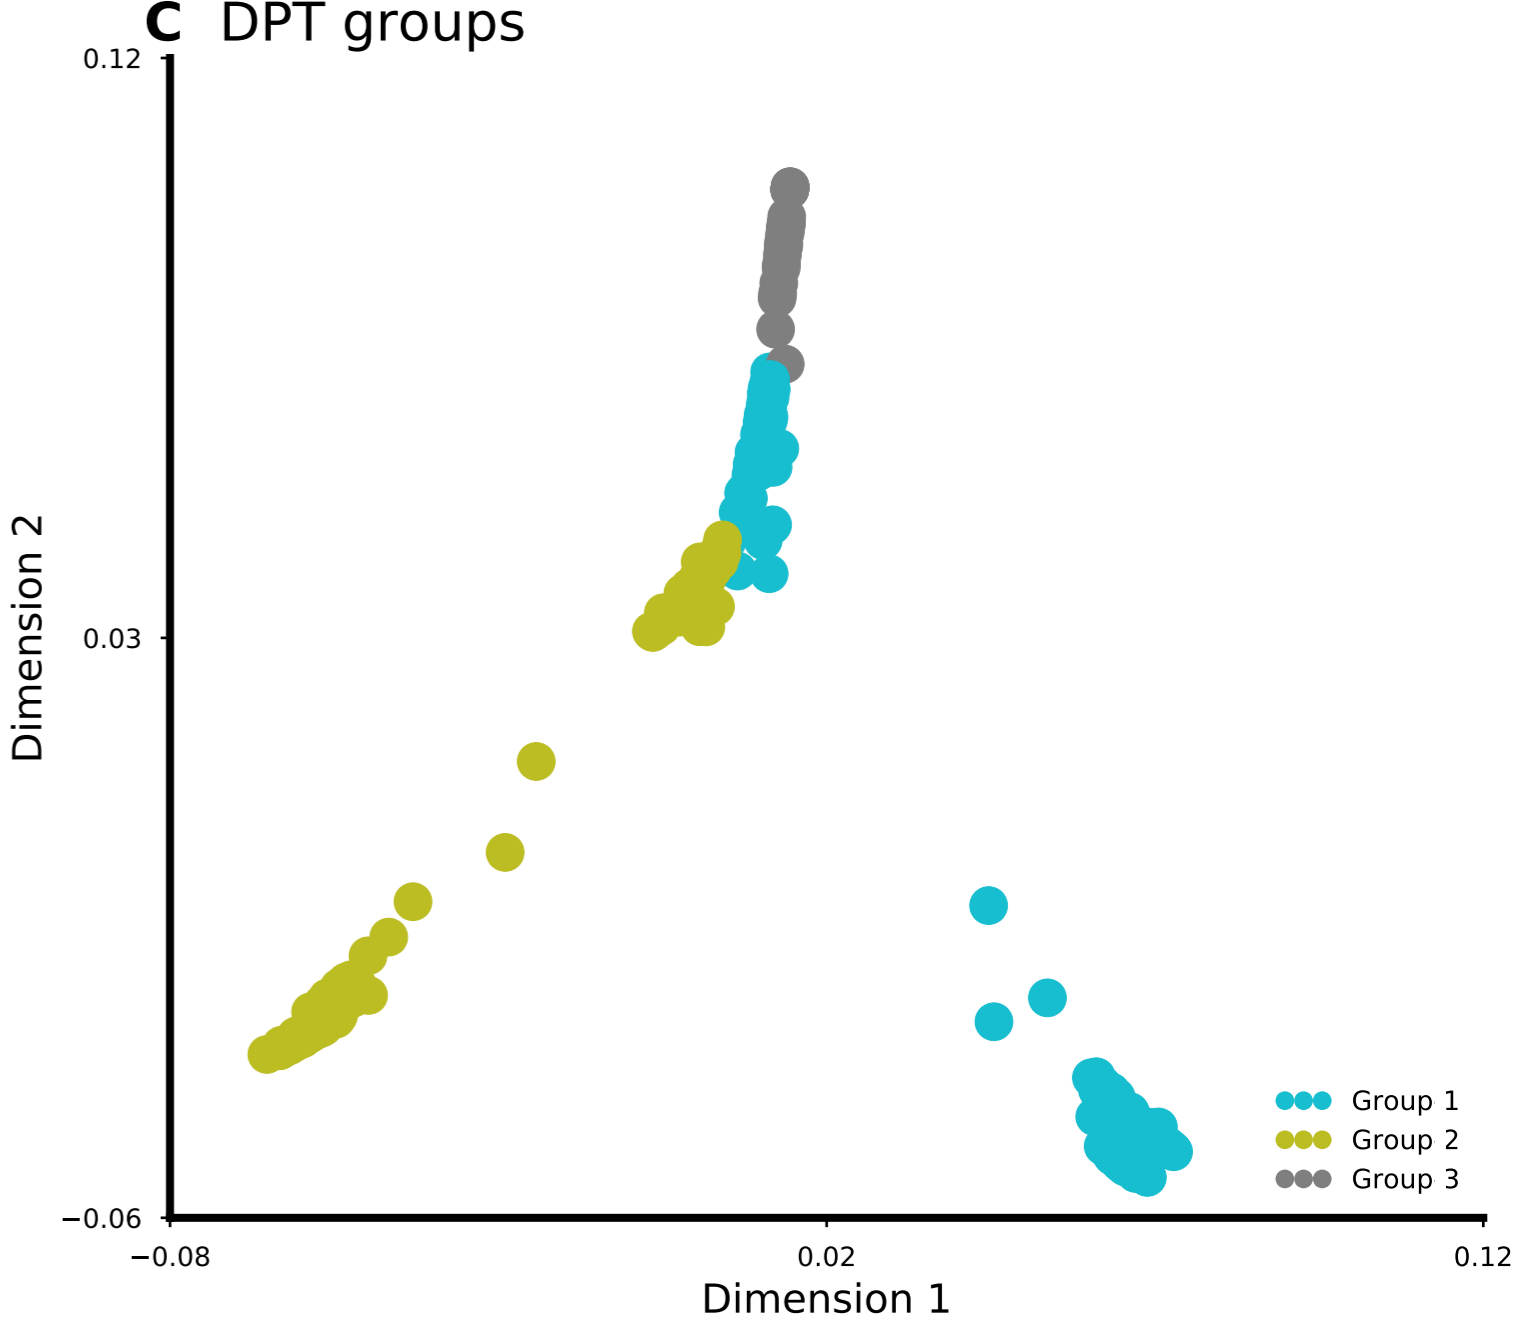

Supplement: mmc3.pdf [file mmc3.pdf]
