# Supplementary material for: DTFLOW: Inference and Visualization of Single-cell Pseudotime Trajectory Using Diffusion Propagation
Source: PubMed Central journal article supplement (PMC8602766; doi:10.1016/j.gpb.2020.08.003), 2021-03-02
Supplement: mmc9.pdf [file mmc9.pdf]

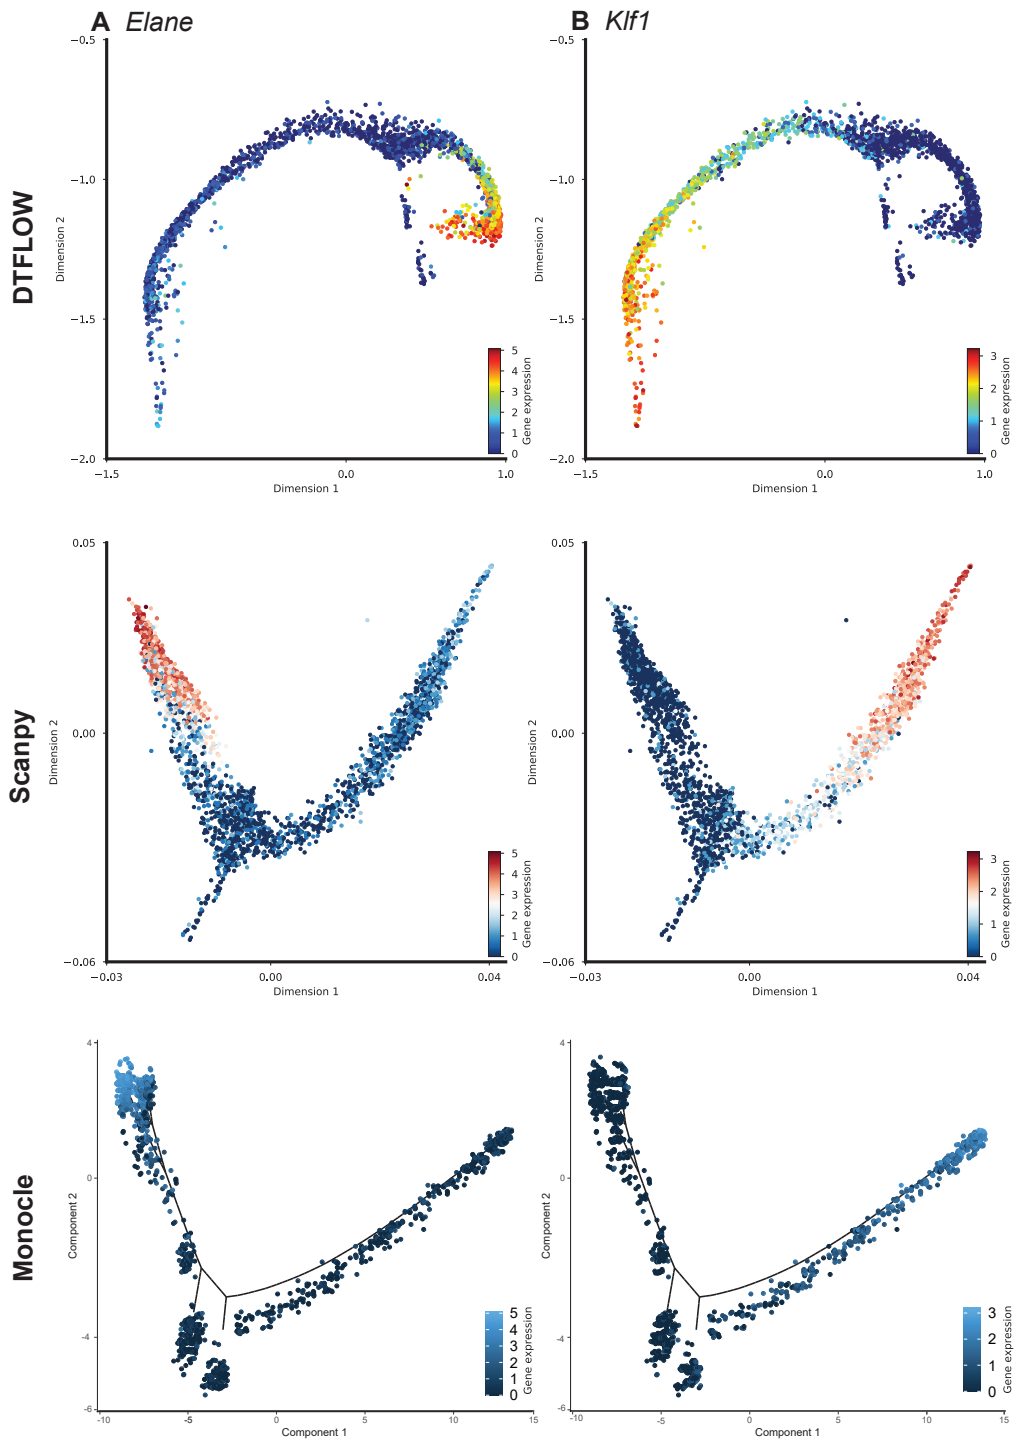

+

+

+

+
