# Supplementary material for: DTFLOW: Inference and Visualization of Single-cell Pseudotime Trajectory Using Diffusion Propagation
Source: PubMed Central journal article supplement (PMC8602766; doi:10.1016/j.gpb.2020.08.003), 2021-03-02

**A** Different time stages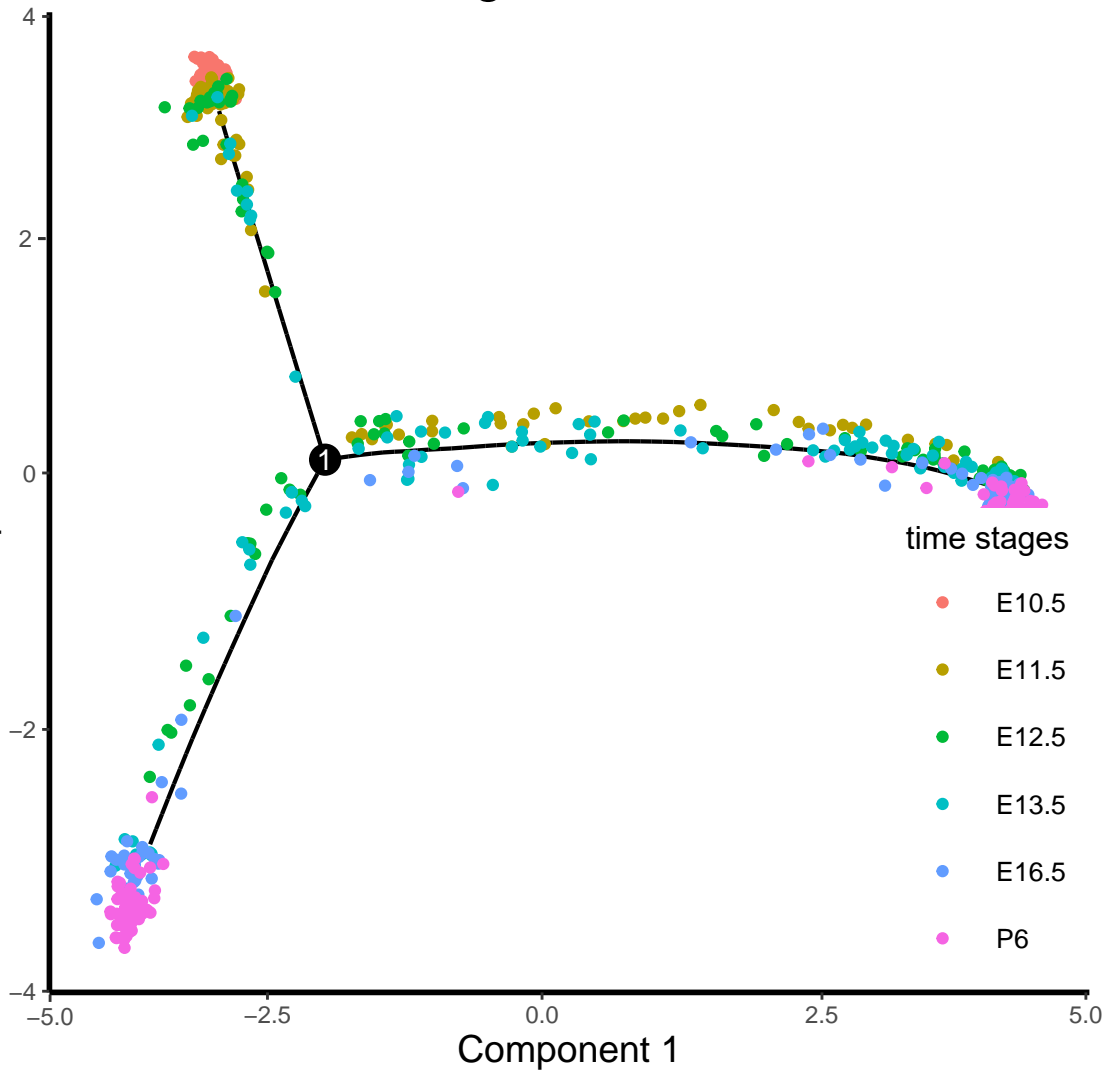**B** Monocle pseudotime trajectory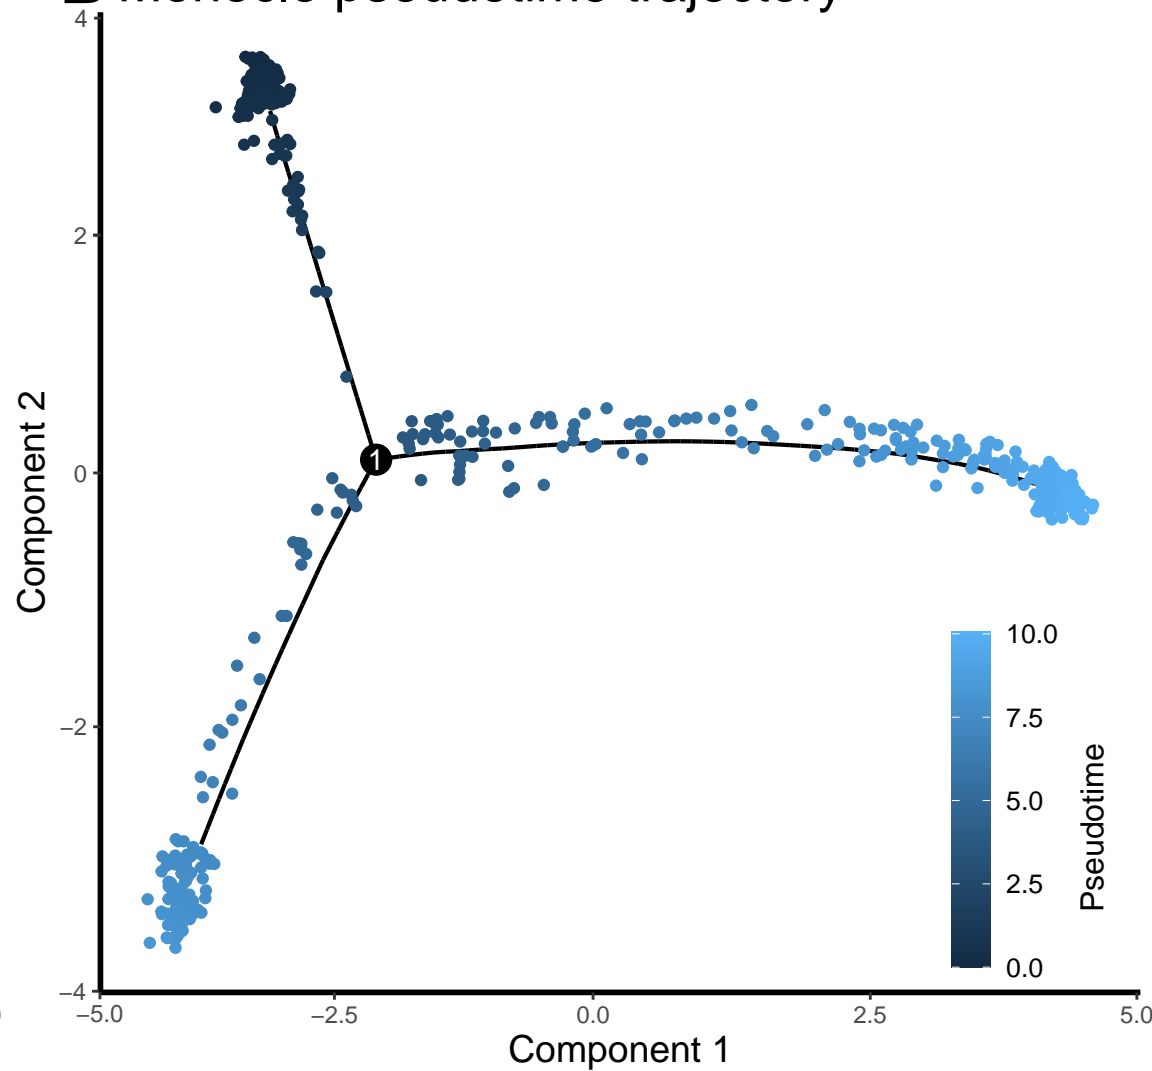**C** Monocle states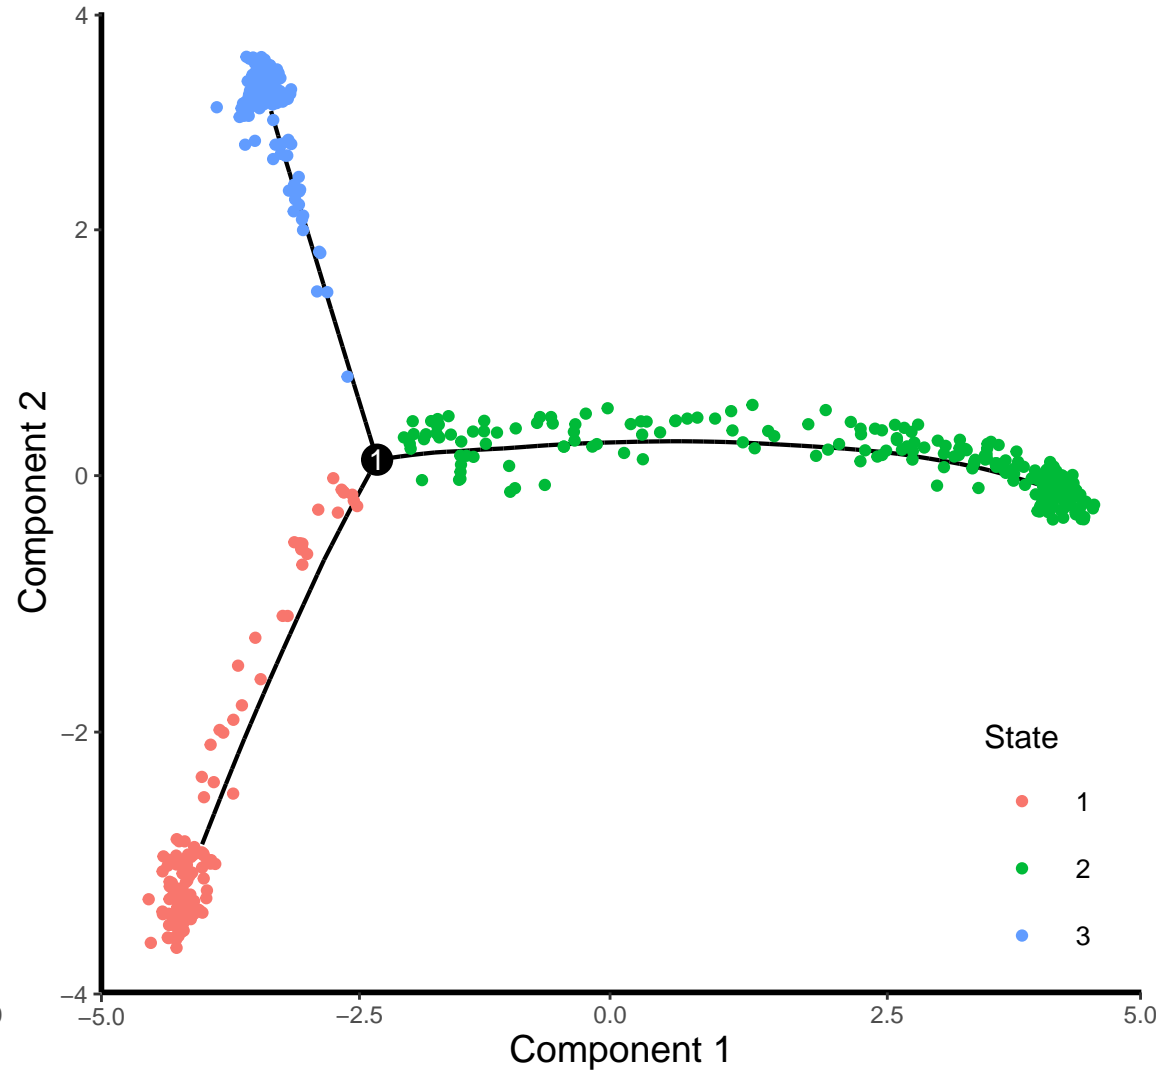

Supplement: mmc11.pdf [file mmc11.pdf]
